# Supplementary material for: NiOx Schottky-gated ZnO nanowire metal–semiconductor field effect transistor: fast logic inverter and photo-detector
Source: Royal Society of Chemistry journal article supplement (doi:10.1039/c4tc00266k), 2014-01-01
Supplement: c4tc00266k1.pdf [file c4tc00266k1.pdf]

## Electronic Supplementary Information

### **NiO<sub>x</sub> Schottky-Gated ZnO Nanowire Metal-Semiconductor Field Effect Transistor: Fast Logic Inverter and Visible Photo-Detector**

Syed Raza Ali Raza,<sup>a</sup> Seyed Hossein Hosseini Shokouh,<sup>a</sup> Young Tack Lee,<sup>a</sup> Ryong Ha,<sup>b</sup> Heon-Jin Choi<sup>b</sup> and Seongil Im\*<sup>a</sup>

<sup>a</sup> Institute of Physics and Applied Physics, Yonsei University 262 Seongsanno, Seodaemun-gu, Seoul 120-749, Korea E-mail: semicon@yonsei.ac.kr

<sup>b</sup> Department of Material Science and Engineering, Yonsei University 262 Seongsanno, Seodaemun-gu, Seoul 120-749 (Korea)

## ESI 1: Bottom-gate transfer properties of the ZnO NW FETs with SiO<sub>2</sub>/p<sup>+</sup>-Si gate

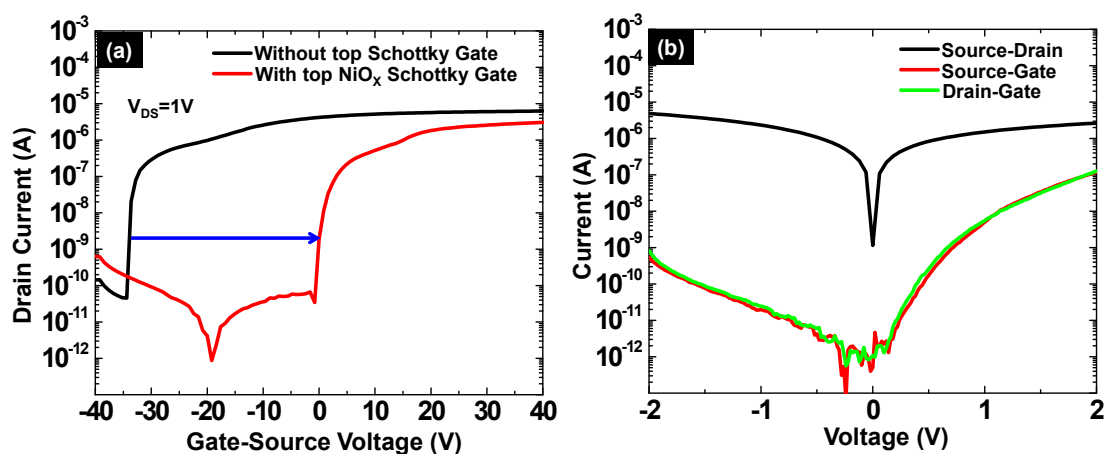

**Figure S1:** (a) Bottom-gate transfer  $I_D$ - $V_{GS}$  properties of ZnO NW FET on a 200 nm SiO<sub>2</sub>/p<sup>+</sup>-Si substrate with (red) and without (black) NiO<sub>x</sub> which is deposited for top-gate MESFET. Transfer curves show the threshold shift to positive direction after NiO<sub>x</sub> deposition due to depletion region formation as reported for CdS nano-belt MESFET.<sup>[1]</sup> (b) Current-voltage properties among MESFET electrodes. An ohmic nature is shown in the contact between ZnO NW and Au/Ti source-drain, while Schottky diode behavior is displayed between ZnO NW and NiO<sub>x</sub> gate electrode.

## ESI 2: Schottky diodes of different metals with ZnO nanowire

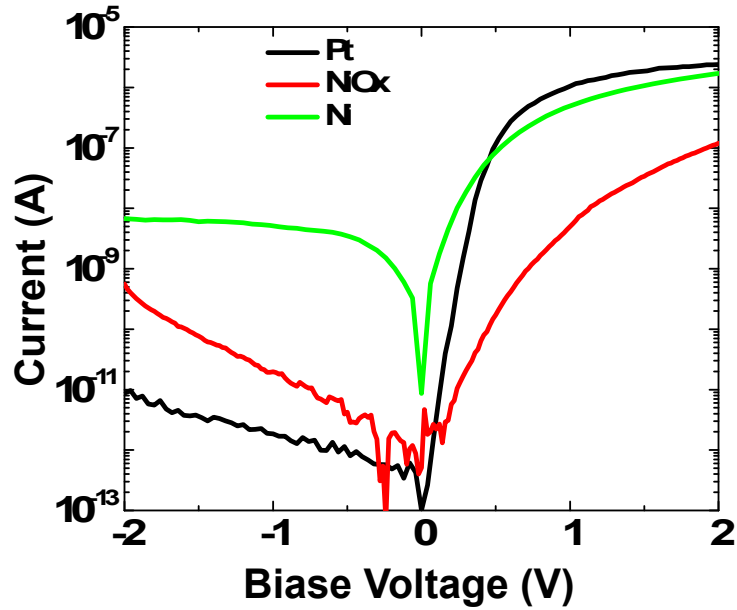

| No. | Metal            | Barrier Height<br>$\phi_B$ (Volts) | Ideality Factor<br>$\eta$ | On/Off Current Ratio |
|-----|------------------|------------------------------------|---------------------------|----------------------|
| 1.  | NiO <sub>x</sub> | 0.65                               | 2.61                      | 10 <sup>5</sup>      |
| 2.  | Ni               | 0.47                               | 2.6                       | 10 <sup>3</sup>      |
| 3.  | Pt               | 0.67                               | 1.34                      | 10 <sup>6</sup>      |

**Figure S2:** I-V properties of the NiO<sub>x</sub>, Ni and Pt diodes with ZnO NW. The table shows the diode parameters i.e. barrier height, ideality factor, and on/off current ratio that are involved with the following equations.<sup>1,2</sup>

$$I = I_o \left( \exp\left(\frac{q(V)}{\eta kT}\right) \right)$$

$$\ln(I) = \ln(I_o) + \frac{qV}{\eta kT} \quad (1)$$

$$I_o = AA^* T^2 \exp\left(-\frac{q\Phi_{Bn}}{kT}\right) \quad (2)$$

Where Richardson's constant for ZnO is  $A^*=3.2 \times 10^6$ ,  $k=1.38 \times 10^{-23}$  J.K<sup>-1</sup> and  $T=297$  K. The ideality factor and barrier height were estimated by using the linear curve fitting of the log of diode current.

## ESI 3: ZnO NW MESFET Mobility Estimation

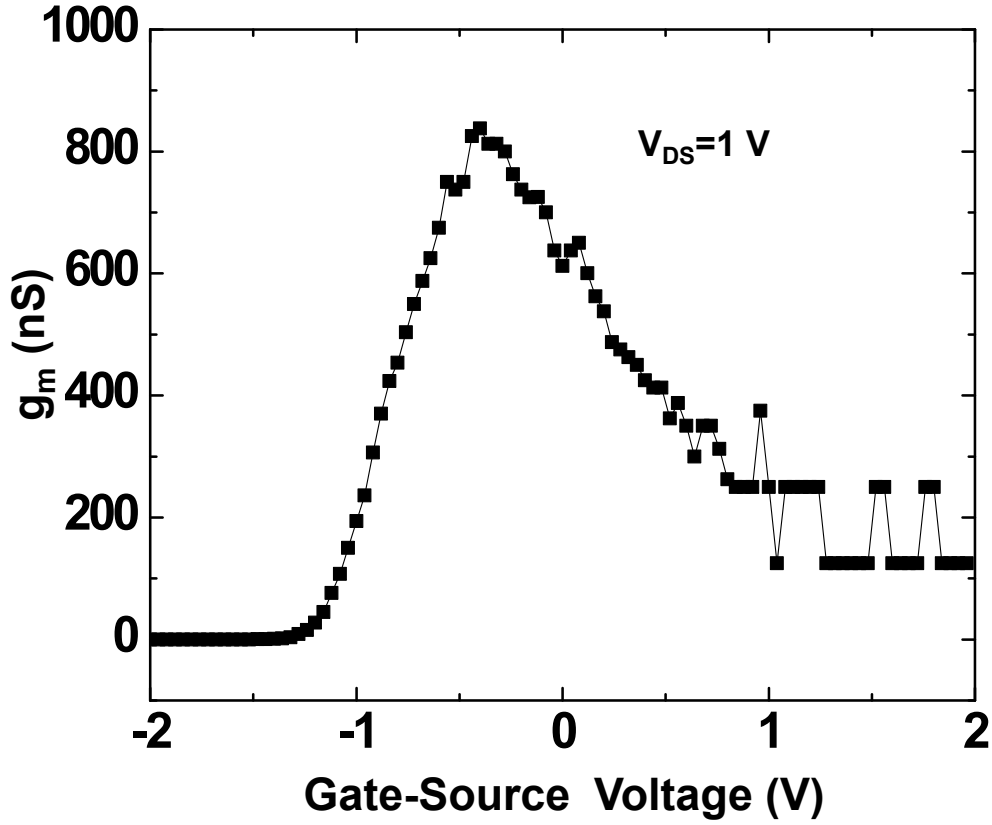

**Figure S3:** Trans-conductance of MESFET in the dark at  $V_{DS}$  of 1 V. The mobility and carrier concentration were estimated using the following equations.<sup>1,2</sup>

$$\mu_e = \frac{g_m a L}{Z \epsilon_{ZnO} V D}; \quad g_m = \frac{dI_D}{dV_G} \quad (3)$$

Radius of NW  $a=110$  nm, Gate length,  $L = 5 \mu\text{m}$ , half cylinder  $Z = \pi \times 110$  nm,  
 $[\epsilon_{ZnO NW}]_{220 \text{ nm dia.}} = 5 \epsilon_o \cdot 3$

$$\mu_e = \frac{8.38 \times 10^{-7} * 110 \times 10^{-7} * 5 \times 10^{-4}}{\pi * 110 \times 10^{-7} * 5 * 8.85 \times 10^{-14} * 1}$$

$$= 301 \text{ cm}^2 \cdot \text{V}^{-1} \cdot \text{s}^{-1}$$

And the carrier concentration is approximately estimated, assuming the resistivity,  $\rho$  as minimum at the maximum transconductance;  $\rho = A/g_m L$ , where  $A$  is  $\pi a^2$ .

$$n = \frac{1}{\mu \rho e} \quad (4)$$

$$n = 4.6 \times 10^{16} \text{ cm}^{-3}$$

**ESI 4: ZnO NW MESFET transfer and gate leakage under various drain biases along with the output curves showing linear and saturation regimes**

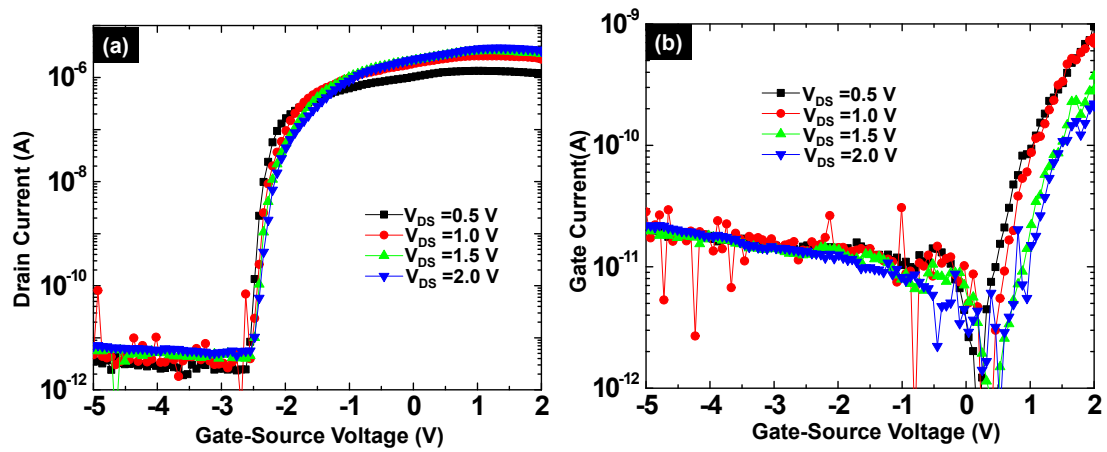

**Figure S4:** (a) Transfer  $I_D$ - $V_{GS}$  and (b) gate leakage  $I_G$ - $V_{GS}$  properties of MESFET at various  $V_{DS}$ .

We have shown the output curves in Fig. 2(b) until  $V_{DS}$  of 1 V (linear regime) however, if we increase  $V_{DS}$  more upto 5 V, the saturation is observed as shown below.

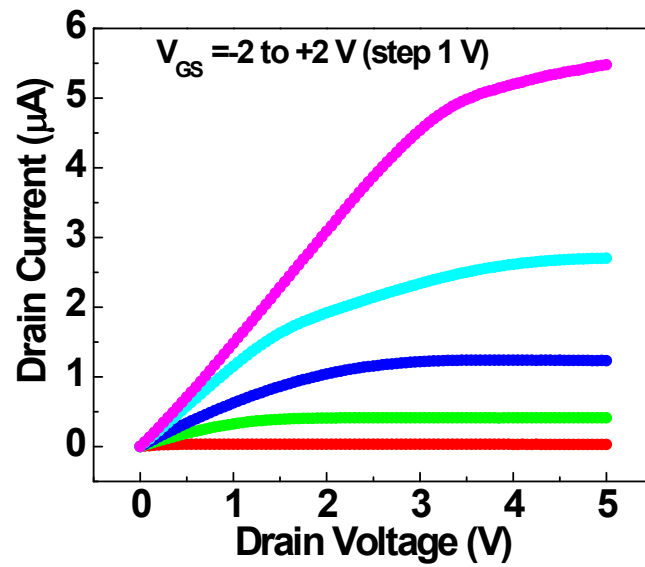

## ESI 5: MESFET vs. MISFET for inverter dynamics and Cutoff frequency

**Inverter Dynamics** comparing the frequency response of MESFET and MISFET. The MISFET based inverter is comprised of a ZnO NW MISFET and a  $0.8\text{ M}\Omega/10\text{ M}\Omega$  external resistor as load. ZnO NW MISFET has the same gate length as that of MESFET, but with a 30 nm atomic layer deposition system deposited  $\text{Al}_2\text{O}_3$  as gate dielectric and a 100 nm thick gold as top gate electrode. Dynamic responses of the MISFET are shown in Fig. S5. The output signal of the MISFET starts distorting at 100 Hz whereas we saw in the main text that there is no apparent distortion in output signal for MESFET until 1 kHz which is limit of our parameter analyser.

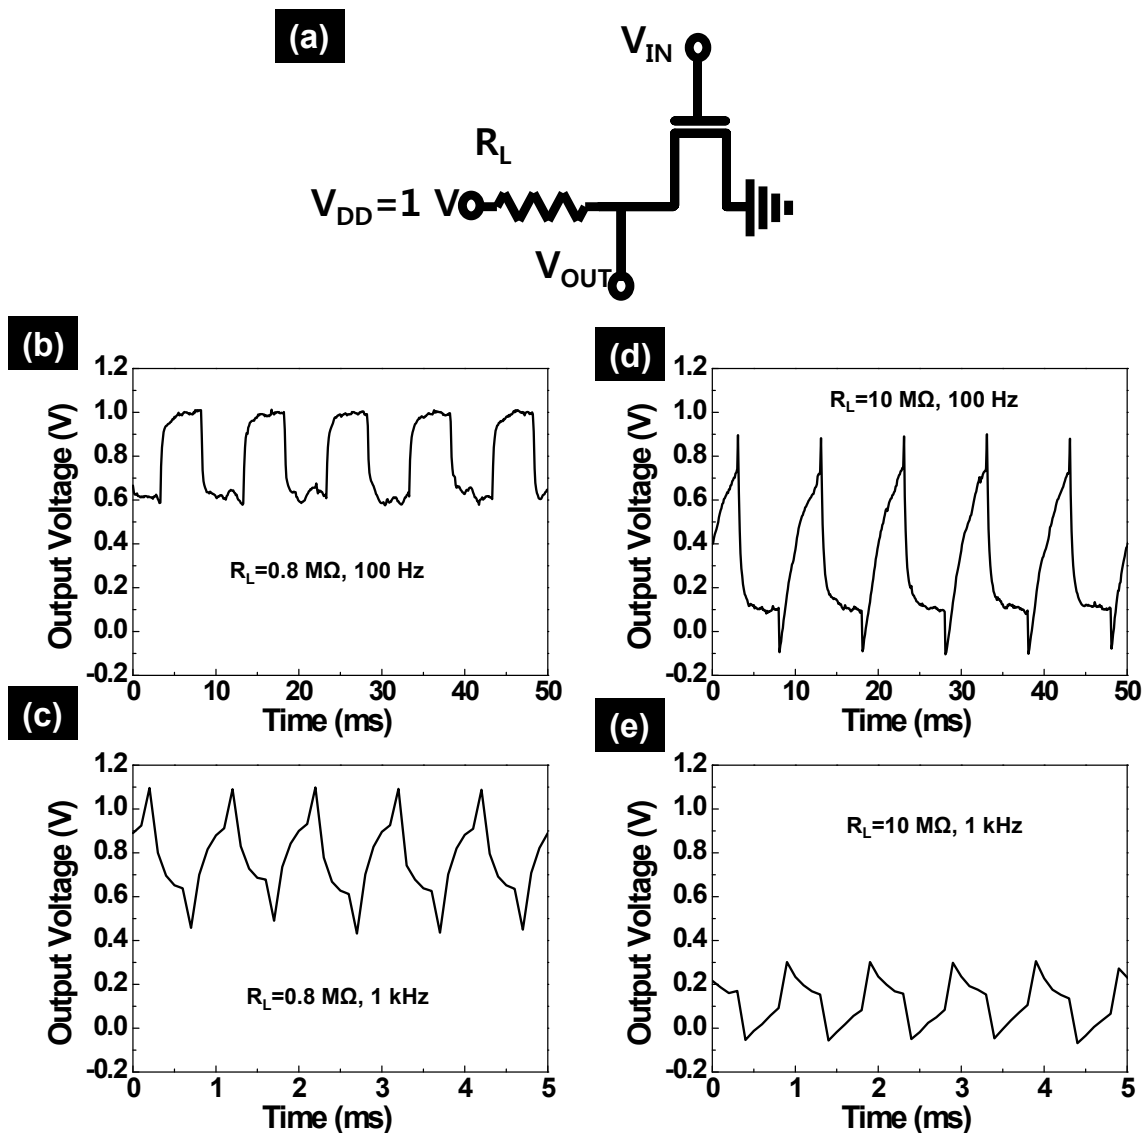

**Figure S5:** (a) The MISFET inverter circuit diagram. Dynamic switching properties of a ZnO nanowire MISFET-based inverter with load resistance of (b, c)  $0.8\text{ M}\Omega$  and (d, e)  $10\text{ M}\Omega$  under square wave input at frequencies of 100 Hz and 1 kHz.

**Cutoff frequencies:** The cutoff frequency is an important figure of merit for high frequency application of MESFET and it is defined as:<sup>1</sup>

$$f_T = \frac{g_m}{2\pi C_G} \quad (5)$$

Here  $g_m$  is trans-conductance  $C_G$  is gate capacitance. By considering semi-cylindrical channel with area  $A=\pi aL_G$  where  $L_G$  is gate length and  $a$  is radius of NW. With a depletion width approximately equal to radius of NW at threshold voltage  $V_T$ , the cut-off frequency is estimated to be:

$$f_T = \frac{g_m}{2\pi \left[ \frac{\pi a L_G \epsilon_0 \epsilon_{ZnO} NW}{\text{Depletion thickness}} \right]}$$

$$f_T = \frac{8.38 \times 10^{-7}}{2\pi \left( \frac{\pi \times 110 \times 10^{-7} \times 5 \times 10^{-4} \times 8.85 \times 10^{-14} \times 5}{110 \times 10^{-7}} \right)}$$

$1.92 \times 10^8$  Hz which is an order of magnitude higher than that estimated for of ZnO NW MISFET.<sup>[4]</sup>

One more method to estimate the cut-off frequency don't need the capacitance information and is given as follows: <sup>5</sup>

$$f_T = \frac{\mu_n q N_D a^2}{2\pi \epsilon_{ZnO} NW \epsilon_0 L_G^2} \quad (6)$$

$$f_T = \frac{301 \times 1.6 \times 10^{-19} \times 4.6 \times 10^{16} \times (110 \times 10^{-7})^2}{2\pi (8.85 \times 10^{-14} \times 5) \times (5 \times 10^{-4})^2}$$

$=3.68 \times 10^8$  Hz which is quite comparable with the previous calculation.

So, above frequencies are 100 times higher than those (~1 MHz) of reported ZnO NW MISFETs.<sup>[4]</sup>

## ESI 6: Persistent Photoconductivity and Photo-gain of the MESFET

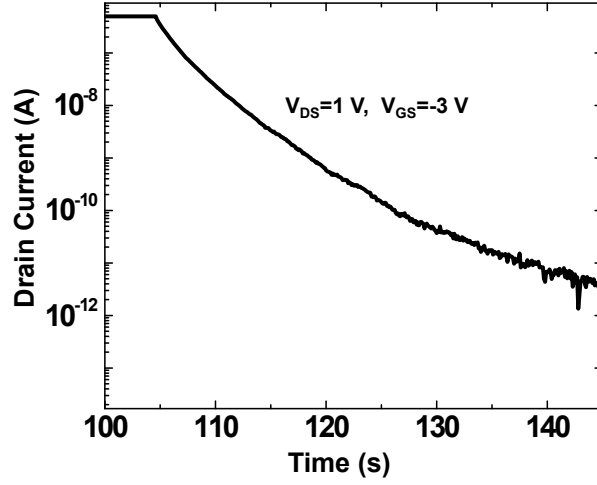

**Figure S6:** Dynamic photo-current i.e.  $I_D$ -t properties of the ZnO NW MESFET with  $\text{NiO}_x$  gate at a bias voltage of  $V_{DS}=1$  V and  $V_{GS}$  of -3 V which shows a recovery time of almost 36 seconds due to persistent photoconductivity (PPC).

The photo-responsivity and photo-gain of the MESFET were estimated using following equations:

$$R = \frac{I_{light} - I_{Dark}}{P_{opt}A} \quad (7)$$

$$G = \frac{Rhc}{e\lambda} \quad (8)$$

Where R is responsivity,  $I_{light}$  &  $I_{Dark}$  are photo & dark currents,  $P_{opt}$  is optical power, A is effective illuminated area, e is electronic charge,  $\lambda$  is wavelength and h is plank constant. The effective area for visible light will be the area covered by the transparent SG. For visible lights (green and blue)

$$A = \pi * Radius * Gate Length = \pi \times 110 \times 10^{-7} \times 5.0 \times 10^{-4} = 1.60 \times 10^{-8} \text{ cm}^2$$

$$R = 2.5 \times 10^4 \text{ A.W}^{-1}$$

$$G = 7.07 \times 10^4$$





## References

1. R. M. Ma, L. Dai, G. G. Qin, *Nano Lett.* 2007, **7**, 868.
2. S. M. Sze, K. K. Ng, *Physics of semiconductor devices*, Wiley. com, 2006.
3. Y. Yang, W. Guo, X. Q. Wang, Z. Z. Wang, J. Qi, Y. Zhang *Nano Lett.* 2012, **12**, 1919.
4. Y. T. Lee, S. R. A. Raza, P. J. Jeon, R. Ha, H. J. Choi, S. Im *Nanoscale* 2013, **5**, 4181.
5. S. M. Sze, M. –K. Lee *Semiconductor Devices: Physics and Technology: Physics and Technology*. Wiley Global Education: 2012.
